# Supplementary material for: Human Chondrocyte Activation by Toxins From Premolis semirufa, an Amazon Rainforest Moth Caterpillar: Identifying an Osteoarthritis Signature
Source: Front Immunol. 2020 Sep 18;11:2191. doi: 10.3389/fimmu.2020.02191 (PMC7531038; doi:10.3389/fimmu.2020.02191)
Supplement: Supplementary file 2 [file Table_2.XLS]

## Sheet: LFC_5000_geneID_ensembl_subread
gene.id	logFC	pvalue	fdr	symbol	entrezid	transcript_id	transcript_name	transcript_biotype	synonyms	mean_CTRL	mean_EXT	mean_IL1B	median_CTRL	median_EXT	median_IL1B	sd1	sd2	sd3	sem1	sem2	sem3	pvals.anova
ENSG00000136244	8.89073	0	0	IL6	3569	ENST00000404625	IL6-204	protein_coding	BSF-2;BSF2;CDF;HGF;HSF;IFN-beta-2;IFNB2;IL-6;IL6	0.259026	123.171	2425.41	0.173865	126.957	2516.99	0.153097	18.5133	230.765	0.0883903	10.6887	133.232	8.52676e-07
ENSG00000137745	7.87594	1.92187e-25	2.4713e-24	MMP13	4322	ENST00000260302	MMP13-201	protein_coding	CLG3;MANDP1;MDST;MMP-13;MMP13	0	1.00384	53.9484	0	0.954225	57.7479	0	0.139001	7.89145	0	0.0802522	4.55613	9.71377e-06
ENSG00000196611	6.39812	1.39818e-242	7.45868e-240	MMP1	4312	ENST00000315274	MMP1-201	protein_coding	CLG;CLGN;MMP1	8.24438	695.91	9064.59	8.54835	685.77	9589.35	2.11431	19.7368	1495	1.2207	11.3951	863.139	2.30941e-05
ENSG00000169429	6.25028	2.22333e-129	2.39953e-127	CXCL8	3576	ENST00000307407	CXCL8-201	protein_coding	GCP-1;GCP1;IL8;LECT;LUCT;LYNAP;MDNCF;MONAP;NAF;NAP-1;NAP1;CXCL8	0.456158	35.08	1846.66	0.46364	35.897	2050.91	0.218091	5.26832	454.124	0.125915	3.04167	262.189	0.000195793
ENSG00000148344	4.85024	0	0	PTGES	9536	ENST00000481476	PTGES-202	processed_transcript	MGST-IV;MGST1-L1;MGST1L1;MPGES;PGES;PIG12;PP102;PP1294;TP53I12;mPGES-1;PTGES	10.2848	296.968	1581.03	10.7506	301.805	1666.8	1.02555	9.17833	195.714	0.592103	5.29911	112.996	5.79306e-06
ENSG00000170961	4.11701	1.02673e-242	5.63825e-240	HAS2	3037	ENST00000303924	HAS2-201	protein_coding	HAS2	8.89776	154.475	117.336	8.86711	156.175	118.512	1.71315	13.2462	4.03273	0.989087	7.64768	2.3283	1.4098e-06
ENSG00000149968	3.59307	3.70144e-156	6.45885e-154	MMP3	4314	ENST00000299855	MMP3-201	protein_coding	CHDS6;MMP-3;SL-1;STMY;STMY1;STR1;MMP3	53.767	648.987	22675.1	56.3901	635.741	23123.7	8.04161	67.9545	1946.4	4.64283	39.2336	1123.76	4.30359e-07
ENSG00000115008	2.13586	0.0756914	0.113952	IL1A	3552	ENST00000263339	IL1A-201	protein_coding	IL-1A;IL1;IL1-ALPHA;IL1F1;IL1A	0.00965916	0.0634948	2.67911	0	0.0908786	2.73755	0.0167301	0.055161	0.463587	0.00965916	0.0318472	0.267652	2.7808e-05
ENSG00000125730	2.06352	1.16838e-103	8.7963e-102	C3	718	ENST00000599668	C3-211	processed_transcript	AHUS5;ARMD9;ASP;C3a;C3b;CPAMD1;HEL-S-62p;C3	41.049	171.66	157.629	41.4594	173.851	159.645	1.33757	15.5157	11.5592	0.772245	8.95797	6.6737	1.34928e-05
ENSG00000152661	1.47381	3.16877e-34	5.62932e-33	GJA1	2697	ENST00000282561	GJA1-201	protein_coding	AVSD3;CMDR;CX43;EKVP;GJAL;HLHS1;HSS;ODDD;PPKCA;GJA1	386.592	1073.81	1602.51	399.686	1094.9	1739.41	37.9474	69.4543	240.047	21.9089	40.0994	138.591	0.000159102
ENSG00000125398	1.35157	9.07303e-67	3.57389e-65	SOX9	6662	ENST00000245479	SOX9-201	protein_coding	CMD1;CMPD1;SRA1;SRXX2;SRXY10;SOX9	39.336	100.374	135.189	38.1343	99.9665	134.903	2.1584	2.19362	3.64625	1.24615	1.26649	2.10516	3.31699e-08
ENSG00000108691	1.30164	1.41522e-25	1.82862e-24	CCL2	6347	ENST00000624362	CCL2-204	TEC	GDCF-2;HC11;HSMCR30;MCAF;MCP-1;MCP1;SCYA2;SMC-CF;CCL2	22.886	56.451	98.1304	24.428	57.3231	101.631	3.9929	2.97192	11.4515	2.3053	1.71584	6.61153	4.3931e-05
ENSG00000087245	1.2916	4.93413e-58	1.61058e-56	MMP2	4313	ENST00000570308	MMP2-208	protein_coding	CLG4;CLG4A;MMP-2;MMP-II;MONA;TBE-1;MMP2	718.515	1758.92	2545.12	709.223	1755.6	2546	16.2053	44.8635	64.3602	9.35613	25.9019	37.1584	1.64195e-08
ENSG00000182326	0.854989	3.00293e-25	3.84289e-24	C1S	716	ENST00000541647	C1S-218	processed_transcript	EDSPD2;C1S	650.399	1176.44	1663.76	650.769	1152.61	1640.45	7.66757	67.1833	41.2476	4.42687	38.7883	23.8143	5.26755e-07
ENSG00000159403	0.750098	5.51151e-20	5.50296e-19	C1R	715	ENST00000542285	C1R-209	protein_coding	EDSPD1;C1R	600.14	1009.41	1056.4	611.248	1018.97	1065.24	33.9641	26.392	16.1353	19.6092	15.2374	9.3157	1.34791e-06
ENSG00000100985	0.61671	0.270278	0.344226	MMP9	4318	ENST00000372330	MMP9-201	protein_coding	CLG4B;GELB;MANDP2;MMP-9;MMP9	0.139167	0.210244	0.821797	0.11591	0.171976	0.875627	0.0542088	0.182608	0.115876	0.0312975	0.105429	0.066901	0.00116658
ENSG00000103044	0.538022	1.65876e-10	8.58629e-10	HAS3	3038	ENST00000568321	HAS3-204	processed_transcript	HAS3	20.0198	29.0613	156.463	20.2553	28.3996	153.78	0.459199	1.15655	5.43807	0.265118	0.667737	3.13967	5.6281e-09
ENSG00000158859	0.521317	0.081028	0.120982	ADAMTS4	9507	ENST00000478394	ADAMTS4-203	processed_transcript	ADAMTS-2;ADAMTS-4;ADMP-1;ADAMTS4	0.665841	0.950487	12.7594	0.724437	1.11784	11.47	0.11233	0.305714	2.60122	0.0648537	0.176504	1.50181	9.66249e-05
ENSG00000189403	0.508908	7.26331e-10	3.55009e-09	HMGB1	3146	ENST00000490788	HMGB1-208	processed_transcript	HMG-1;HMG1;HMG3;SBP-1;HMGB1	96.5684	137.43	169.016	97.4512	138.317	172.244	3.67716	3.15468	12.5852	2.12301	1.82136	7.26605	8.47692e-05
ENSG00000148334	0.476489	9.67765e-06	3.03072e-05	PTGES2	80142	ENST00000487063	PTGES2-210	processed_transcript	C9orf15;GBF-1;GBF1;PGES2;mPGES-2;PTGES2	18.5992	25.8765	25.9353	19.8785	26.3983	25.4661	2.33223	2.59645	0.901071	1.34651	1.49906	0.514766	0.00749768
ENSG00000232810	0.393804	0.796735	0.840918	TNF	7124	ENST00000449264	TNF-208	protein_coding	DIF;TNF-alpha;TNFA;TNFSF2;TNLG1F;TNF	0.0111735	0.0151464	1.72141	0	0	1.80193	0.0193531	0.0262344	0.197969	0.0111735	0.0151464	0.514766	2.51933e-06
ENSG00000105329	0.353498	4.35321e-05	0.000124261	TGFB1	7040	ENST00000598758	TGFB1-203	protein_coding	CED;DPD1;LAP;TGFB;TGFbeta;TGFB1	126.693	161.832	178.111	125.468	162.087	177.075	7.32988	12.1484	7.53363	4.23191	7.01387	0.514766	0.00135905
ENSG00000068001	0.352738	0.000511282	0.00122638	HYAL2	8692	ENST00000447092	HYAL2-208	protein_coding	LUCA2;HYAL2	18.2434	23.3116	21.5935	18.9727	23.0878	22.2816	1.66089	0.643718	2.14312	0.958916	0.371651	0.514766	0.0220433
ENSG00000035862	0.229567	0.0132756	0.0241328	TIMP2	7077	ENST00000585421	TIMP2-203	protein_coding	CSC-21K;DDC8;TIMP2	1377.01	1614.49	1421.15	1322.32	1598.56	1384.17	133.883	50.318	69.0302	77.2976	29.0511	0.514766	0.0410966
ENSG00000182492	0.188313	0.0426973	0.0688727	BGN	633	ENST00000472615	BGN-203	processed_transcript	DSPG1;MRLS;PG-S1;PGI;SEMDX;SLRR1A;BGN	1731.26	1972.64	1278.32	1675.02	1929.01	1300.85	108.256	93.7979	102.587	62.5016	54.1542	0.514766	0.000454318
ENSG00000106804	0.0996969	0.489608	0.568641	C5	727	ENST00000489802	C5-205	processed_transcript	C5D;C5a;C5b;CPAMD4;ECLZB;C5	9.4309	10.0833	6.45315	8.91647	9.81489	6.17696	1.09007	1.03051	1.3114	0.629354	0.594967	0.514766	0.0177985
ENSG00000102265	0.0935351	0.307067	0.383418	TIMP1	7076	ENST00000218388	TIMP1-201	protein_coding	CLGI;EPA;EPO;HCI;TIMP;TIMP-1;TIMP1	993.356	1059.91	1486.7	1019.06	1054.82	1464.49	86.5467	35.2219	79.1405	49.9678	20.3354	0.514766	0.000277161
ENSG00000186792	0.0681895	0.708703	0.767536	HYAL3	8372	ENST00000359051	HYAL3-202	protein_coding	HYAL-3;LUCA-3;LUCA3;HYAL3	2.28165	2.41759	2.18499	2.07632	2.63548	2.15258	0.383307	0.380936	0.0917852	0.221303	0.219933	0.514766	0.681541
ENSG00000114378	0.00900289	0.92404	0.942103	HYAL1	3373	ENST00000395144	HYAL1-204	protein_coding	HYAL-1;LUCA1;MPS9;NAT6;HYAL1	10.4515	10.529	8.34377	10.5478	10.7574	8.35494	0.333777	0.405725	0.11745	0.192706	0.234245	0.514766	0.00020667
ENSG00000244731	0.00146246	0.990741	0.992815	C4A	720	ENST00000467948	C4A-249	processed_transcript	C4;C4A2;C4A3;C4A4;C4A6;C4AD;C4S;CO4;CPAMD2;RG;C4A	8.51025	8.52831	12.7389	8.48071	8.51629	12.5761	0.0582286	1.05342	1.63362	0.0336183	0.60819	0.514766	0.00537651
ENSG00000125538	0	1	1	IL1B	3553	ENST00000491056	IL1B-207	processed_transcript	IL-1;IL1-BETA;IL1F2;IL1B	0	0	3.43792	0	0	3.48843	0	0	0.677749	0	0	0.514766	5.23552e-05
ENSG00000224389	-0.0340268	0.756479	0.807442	C4B	721	ENST00000485543	C4B-212	processed_transcript	C4B1;C4B12;C4B2;C4B3;C4B5;C4BD;C4B_2;C4F;CH;CO4;CPAMD3;C4B	15.7617	15.424	23.6912	16.2274	16.1309	23.0414	1.44074	1.72567	1.69225	0.83181	0.996314	0.514766	0.0012455
0,00+E14184:F141849	-0.458951	0.000122672	0.000326641	COL1A1	1277	ENST00000225964	COL1A1-201	protein_coding	EDSC;OI1;OI2;OI3;OI4;COL1A1	8003.07	5822.34	3593.57	7371.91	5747.35	3534.95	1111.51	229.893	487.949	641.728	132.729	0.514766	0.000850617
ENSG00000141510	-0.491289	1.04578e-07	4.10293e-07	TP53	7157	ENST00000574684	TP53-215	processed_transcript	BCC7;LFS1;P53;TRP53;TP53	25.7592	18.3452	7.37475	25.8479	18.9749	7.64343	0.158512	1.81932	0.478238	0.0915169	1.05038	0.514766	2.56872e-06
ENSG00000182963	-0.613398	4.1199e-13	2.66537e-12	GJC1	10052	ENST00000587113	GJC1-205	protein_coding	CX45;GJA7;GJC1	24.7368	16.1735	13.6877	24.8723	16.0798	13.6426	0.857637	0.865769	0.302274	0.495157	0.499852	0.514766	3.65189e-06
ENSG00000139219	-0.664131	0.0778981	0.116869	COL2A1	1280	ENST00000493991	COL2A1-208	processed_transcript	ANFH;AOM;COL11A3;SEDC;STL1;COL2A1	1.29046	0.80834	1.14646	1.23909	0.498029	1.17819	0.362625	0.559348	0.292738	0.209362	0.32294	0.514766	0.409479
ENSG00000171345	-0.923345	0.0199468	0.0348225	KRT19	3880	ENST00000361566	KRT19-201	protein_coding	CK19;K19;K1CS;KRT19	0.611604	0.324821	0.0657714	0.695459	0.318075	0.0364845	0.213996	0.0704719	0.0634824	0.123551	0.040687	0.514766	0.00762005
ENSG00000157766	-1.48255	2.08544e-36	3.92513e-35	ACAN	176	ENST00000439576	ACAN-202	protein_coding	AGC1;AGCAN;CSPG1;CSPGCP;MSK16;SEDK;ACAN	1314.55	470.391	740.552	1283.67	459.3	705.284	156.613	37.9599	91.2896	90.4205	21.9161	0.514766	0.000194704
